# Supplementary material for: Chiral layered molecular spaces with amino acids
Source: Royal Society of Chemistry journal article supplement (doi:10.1039/b913190f), 2009-01-01
Supplement: b913190f.pdf [file b913190f.pdf]

## Supporting Information

*Wanjun Liu<sup>a</sup>, Ken Yao<sup>\*a</sup>, Wenfeng Shangguan<sup>b</sup> and Jian Yuan<sup>b</sup>*

<sup>a</sup>Department of Chemistry, Shanghai University, Shanghai 200444, P.R.China,

<sup>b</sup>Res Ctr Combust & Environm Technol, Shanghai Jiao Tong University,  
Shanghai 200240, P. R. China

E-mail: yao850618jp@yahoo.co.jp

The reaction precipitate between L-Leu-OtBu and CPAPhS in different synthesis condition was also examined by <sup>13</sup>C CP/MAS NMR spectra. SIF 1a (Supporting Information Figure 1a) showed the <sup>13</sup>C CP/MAS NMR spectrum of L-Leu-OtBu-APAPhS, which was synthesized by mixing 0.2g CPAPhS and 0.4g L-Leu-OtBu in anhydrous DMF and the suspension was stirred at 50 °C for 3h. The resonance peak at 173 ppm, which assigned to carbon species of carbonyl in carboxylic acid -C(=O)OH, decreased compared with <sup>13</sup>C CP/MAS NMR spectrum of CPAPhS (Figure 2a). The <sup>13</sup>C CP/MAS NMR spectrum of L-Leu-APAPhS showed that the resonance peak at 173 ppm increased compared with L-Leu-OtBu-APAPhS after released with dilute trifluoroacetic acid (TFA) (50% TFA in CH<sub>2</sub>Cl<sub>2</sub>) (SIF 1b). A resonance peak at 164 ppm, which assigned to carbon species of carbonyl in amide formed between carboxyl groups in CPAPhS and NH<sub>2</sub> groups in L-Leucine, was also observed in <sup>13</sup>C CP/MAS NMR spectra of L-Leu-OtBu-APAPhS and L-Leu-APAPhS (SIF 1). Apparently, grafting yield of L-Leu-OtBu in the reaction precipitate of heated for 3h (SIF 1) was lower than in the reaction precipitate of heated for 6h (Figure 2). But, the same behaviors of <sup>13</sup>C CP/MAS NMR spectra were observed in L-Leu-OtBu-APAPhS and L-Leu-APAPhS of different synthesis condition. The <sup>13</sup>C CP/MAS NMR spectra of L-Leu-OtBu-APAPhS and L-Leu-APAPhS in different synthesis condition further indicated that the two-dimensional molecular space with

L-Leucine (layered L-Leu-APAPhS) was successfully synthesized by grafting L-Leucine in layered CPAPhS.

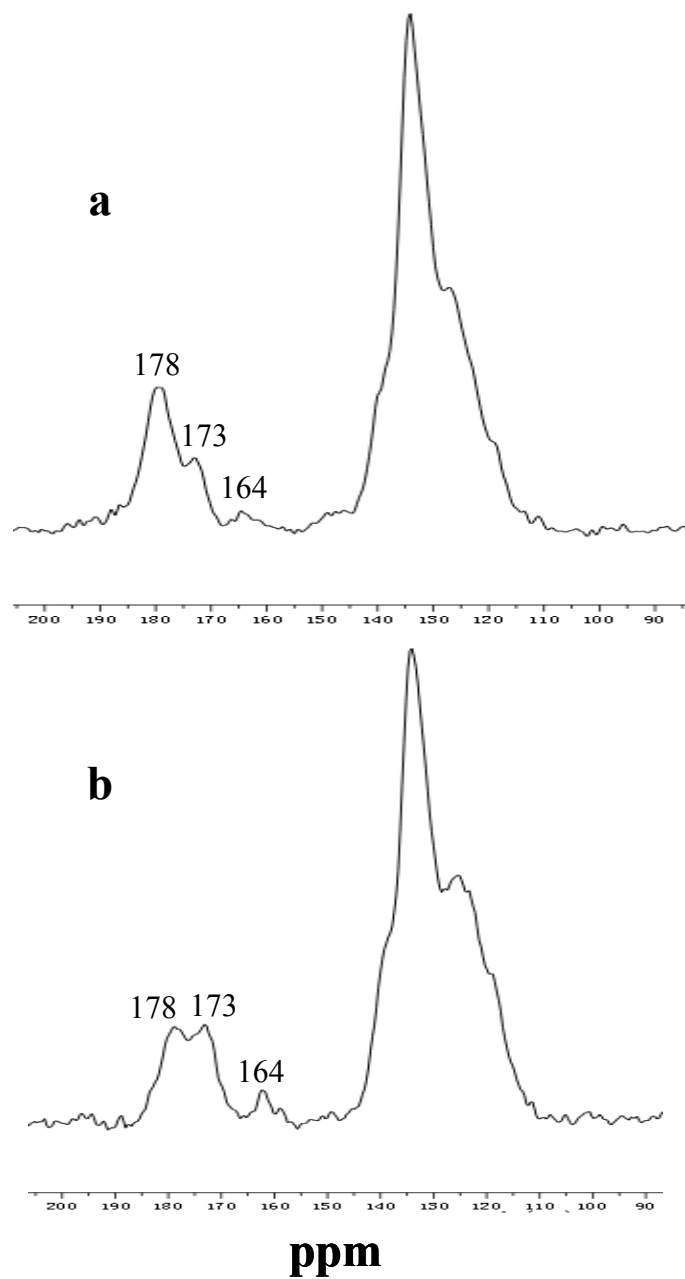

SIF 1.  $^{13}\text{C}$  CP/MAS NMR spectra of (a) L-Leu-OtBu-APAPhS formed at 50 °C for 3h, (b) L-Leu-APAPhS (cleavage precipitates from a)
